# Supplementary material for: Interlog protein network: an evolutionary benchmark of protein interaction networks for the evaluation of clustering algorithms
Source: PubMed Central journal article supplement (PMC4595048; doi:10.1186/s12859-015-0755-1), 2015-10-05
Supplement: 12859_2015_755_MOESM4_ESM.pdf [file 12859_2015_755_MOESM4_ESM.pdf]

UniProtKB IDs  
Organism [OS]: Human,  
mouse, fruit fly, worm  
Subcellular location:  
Mitochondrion

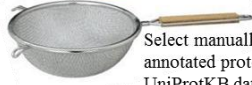

Select manually  
annotated proteins via  
UniProtKB database

Mitochondrial protein IDs  
of species  
Reviewed: yes

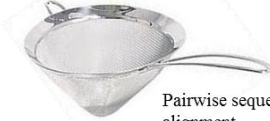

Pairwise sequence  
alignment

Orthologues protein  
sets (OPs)  
Identity:  $\geq 30\%$

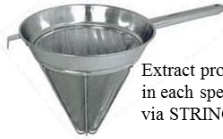

Extract protein interaction  
in each species separately  
via STRING database

Protein-protein interaction  
networks (PPINs)

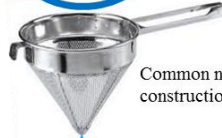

Common network  
construction

Interlog protein  
network (IPN)
